# Supplementary material for: Replication and extension of genome-wide association study results for obesity in 4923 adults from northern Sweden
Source: PubMed Central journal article supplement — Hum Mol Genet. 2009 Jan 22;18(8):1489–96. doi: 10.1093/hmg/ddp041 (PMC2664142; doi:10.1093/hmg/ddp041), 2009-01-22
Supplement: ddp041_1.pdf [file ddp041_1.pdf]

## **Appendix 1**

### **MEMBERSHIP OF GIANT CONSORTIUM**

#### **Steering Committee**

Gonçalo R. Abecasis<sup>1</sup>, Inês Barroso<sup>2</sup>, Michael Boehnke<sup>3</sup>, Panagiotis Deloukas<sup>2</sup>, Timothy M. Frayling<sup>4</sup>, Leif C. Groop<sup>5,6</sup>, Richard B. Hayes<sup>7</sup>, Joel N. Hirschhorn<sup>8-10</sup> (chair), David J. Hunter<sup>11-14</sup>, Ruth J.F. Loos<sup>15,16</sup>, Mark I. McCarthy<sup>17-19</sup>, Karen L. Mohlke<sup>20</sup>, David Schlessinger<sup>21</sup>, David P. Strachan<sup>22</sup>, H-Erich Wichmann<sup>23,24</sup>

#### **Analysis Working Group**

Gonçalo R. Abecasis<sup>1</sup> (chair), Sonja I. Berndt<sup>7</sup>, Timothy M. Frayling<sup>4</sup>, Christian Gieger<sup>23</sup>, Iris M. Heid<sup>23</sup>, Joel N. Hirschhorn<sup>8-10</sup>, Guillaume Lettre<sup>9,11</sup>, Shengxu Li<sup>15,16</sup>, Cecilia M. Lindgren<sup>17</sup>, Ruth J.F. Loos<sup>15,16</sup>, Helen N. Lyon<sup>8,9</sup>, Lu Qi<sup>12,13</sup>, Paul Scheet<sup>1</sup>, Elizabeth K. Speliotes<sup>8,25</sup>, Michael N. Weedon<sup>4</sup>, Eleanor Wheeler<sup>2</sup>, Cristen J. Willer<sup>3</sup> (lead), Jing Hua Zhao<sup>15,16</sup>

#### **Obesity Working Group**

Gonçalo R. Abecasis<sup>1</sup> (chair), Iris M. Heid<sup>23</sup>, Joel N. Hirschhorn<sup>8-10</sup>, Frank B. Hu<sup>12,13</sup>, Ruth J.F. Loos<sup>15,16</sup>, Helen N. Lyon<sup>8,9</sup> (lead), Karen L. Mohlke<sup>20</sup>, Lu Qi<sup>12,13</sup>, Paul Scheet<sup>1</sup>, Elizabeth K. Speliotes<sup>8,25</sup>, Michael N. Weedon<sup>4</sup>, Cristen J. Willer<sup>3</sup>, Jing Hua Zhao<sup>15,16</sup>

## **Copy Number Polymorphism Analysis**

David Altshuler<sup>11,26</sup>, Amanda L. Elliott<sup>11,26</sup> (lead), Steve A. McCarroll<sup>11,26</sup> (chair),

Elizabeth K. Speliotes<sup>8,25</sup>

## **Expression Analysis**

Inês Barroso<sup>2</sup> (chair), Zorica Jovanovic<sup>16,27</sup>, Rosa Maria Roccasecca<sup>2</sup> (lead), Y.C. Loraine

Tung<sup>16,27</sup>

## **Oversight of contributing cohorts**

**CoLaus:** Vincent Mooser<sup>28</sup>, Peter Vollenweider<sup>29</sup>

**SardiNIA:** David Schlessinger<sup>21</sup>, Manuela Uda<sup>30</sup>

**DGI:** David Altshuler<sup>11,26</sup>, Leif C. Groop<sup>5,6</sup>

**EPIC-Obesity:** Nicholas J. Wareham<sup>15,16</sup>

**FUSION:** Richard N. Bergman<sup>31</sup>, Michael Boehnke<sup>3</sup>, Francis S. Collins<sup>32</sup>, Karen L.

Mohlke<sup>20</sup>, Jaakko Tuomilehto<sup>33</sup>

**NHS:** David J. Hunter<sup>11-14</sup>

**PLCO:** Stephen J. Chanock<sup>7</sup>, Richard B. Hayes<sup>7</sup>

**WTCCC-CAD:** Nilesh J. Samani<sup>34</sup>

**WTCCC-HT:** Mark J. Caulfield<sup>35</sup>

**WTCCC-T2D:** Timothy M. Frayling<sup>4</sup>, Andrew T. Hattersley<sup>36</sup>, Mark I. McCarthy<sup>17-19</sup>,

Eleftheria Zeggini<sup>17</sup>

**KORA:** H-Erich Wichmann<sup>23,24</sup>

**WTCCC-NBD:** Willem H. Ouwehand<sup>2,37</sup>, Jonathan Stephens<sup>37</sup>

**BC58:** David P. Strachan<sup>22</sup>

**EPIC-Norfolk:** Sheila A. Bingham<sup>38,39</sup>, Kay-Tee Khaw<sup>40</sup>

**FINRISK97:** Pekka Jousilahti<sup>41</sup>, Leena Peltonen<sup>2,11,42</sup>, Veikko Salomaa<sup>41</sup>

**METSIM:** Johanna Kuusisto<sup>43</sup>, Markku Laakso<sup>43</sup>

**ALSPAC:** George Davey Smith<sup>44</sup>, Ken K. Ong<sup>15,16</sup>

**PPP-Botnia:** Leif C. Groop<sup>5,6</sup>, Bo Isomaa<sup>45</sup>, Tiinamaija Tuomi<sup>77,78</sup>

**FUSION (stage 2):** Jaakko Tuomilheto<sup>33</sup>

**SCOOP:** I. Sadaf Farooqi<sup>16,27</sup>, Stephen O’Rahilly<sup>16,27</sup>

**Hertfordshire:** Cyrus Cooper<sup>46</sup>

**Rotterdam Study:** Albert Hofman<sup>47</sup>, André G. Uitterlinden<sup>47,48</sup>, Jacqueline C.M.

Witteman<sup>47</sup>

**NFBC 1966:** Marjo-Riitta Jarvelin<sup>49</sup>, Jaana Laitinen<sup>50</sup>, Mark I. McCarthy<sup>17-19</sup>, Aimo

Ruukonen<sup>51</sup>

**TwinsUK:** Panagiotis Deloukas<sup>2</sup>, Timothy D. Spector<sup>52</sup>

**InChianti:** Luigi Ferrucci<sup>53</sup>

**BLSA:** Jack M. Guralnik<sup>54</sup>

**Phenotype modeling and genotype-phenotype association analysis in  
contributing cohorts**

**CoLaus:** Toby Johnson<sup>55-57</sup>, Noha Lim<sup>28</sup>, Kijoung Song<sup>28</sup>, Gerard Waeber<sup>29</sup>, Dawn

M. Waterworth<sup>28</sup>

**SardiNIA:** Edward G. Lakatta<sup>58</sup>, Serena Sanna<sup>30</sup>, Angelo Scuteri<sup>59</sup>, Paul Scheet<sup>1</sup>

**DGI:** Peter Almgren<sup>5</sup>, Helen N. Lyon<sup>8,9</sup>, Martin Ridderstråle<sup>60</sup>, Elizabeth K. Speliotes<sup>8,25</sup>

**EPIC-Obesity:** Shengxu Li<sup>15,16</sup>, Ruth J.F. Loos<sup>15,16</sup>, Manjinder S. Sandhu<sup>15,40</sup>, Eleanor Wheeler<sup>2</sup>, Jing Hua Zhao<sup>15,16</sup>

**FUSION:** Peter Chines<sup>32</sup>, Laura J. Scott<sup>3</sup>, Timo T. Valle<sup>33</sup>, Richard M. Watanabe<sup>61</sup>, Cristen L. Willer<sup>3</sup>

**NHS:** Frank B. Hu<sup>12,13</sup>, Peter Kraft<sup>14</sup>, Lu Qi<sup>12,13</sup>

**PLCO:** Sonja I. Berndt<sup>7</sup>, Kevin B. Jacobs<sup>62</sup>

**WTCCC-CAD:** Alistair S. Hall<sup>63</sup>, Massimo Mangino<sup>34</sup>, Suzanne Stevens<sup>34</sup>

**WTCCC-HT:** Patricia B. Munroe<sup>35</sup>, Chris Wallace<sup>35</sup>

**WTCCC-T2D:** Inga Prokopenko<sup>17,18</sup>, Joshua C. Randall<sup>17</sup>, Michael N. Weedon<sup>4</sup>

**KORA:** Johannes Hebebrand<sup>64</sup>, Iris M. Heid<sup>23</sup>, Claudia Lamina<sup>7</sup>

**WTCCC-NBD:** David M. Evans<sup>44</sup>, Nicholas Watkins<sup>37</sup>

**BC58:** David Hadley<sup>22</sup>, Wendy L. McArdle<sup>65</sup>, Konstantinos Papadakis<sup>22</sup>, Susan M. Ring<sup>65</sup>

**EPIC-Norfolk:** Shengxu Li<sup>15,16</sup>, Ruth J.F. Loos<sup>15,16</sup>, Robert N. Luben<sup>40</sup>, Karani S. Vimalaswaran<sup>15,16</sup>

**FINRISK97:** Aki S. Havulinna<sup>41</sup>, Mikko Kuokkanen<sup>11,66</sup>, Kaisa Silander<sup>66</sup>, Elizabeth K. Speliotes<sup>8,25</sup>

**METSIM:** Anne U. Jackson<sup>3</sup>

**ALSPAC:** Andrew R. Ness<sup>67</sup>, Kate Northstone<sup>65</sup>, Nicholas J. Timpson<sup>44</sup>

**PPP-Botnia:** Peter Almgren<sup>5</sup>, Bo Isomaa<sup>45</sup>, Elizabeth K. Speliotes<sup>8,25</sup>

**FUSION (stage 2):** Narisu Narisu<sup>32</sup>, Jouko Saramies<sup>68</sup>, Heather M. Stringham<sup>3</sup>, Timo T. Valle<sup>33</sup>

**SCOOP:** Carolin Purmann<sup>16,27</sup>

**Hertfordshire:** Elaine M. Dennison<sup>46</sup>, Ruth J.F. Loos<sup>15,16</sup>

**MRC-Ely:** Jian'an Luan<sup>15,16</sup>, Ruth J.F. Loos<sup>15,16</sup>

**Rotterdam Study:** Karol Estrada<sup>48</sup>, Leonie C. Jacobs<sup>48</sup>, Fernando Rivadeneira<sup>47,48</sup>,  
Cornelia M. Van Duijn<sup>47</sup>, M. Carola Zillikens<sup>48</sup>

**NFBC 1966:** Amanda Bennett<sup>69</sup>, Lachlan Coin<sup>49</sup>, Paul Elliott<sup>49</sup>, Leena Peltonen<sup>2,11,42</sup>

**TwinsUK:** Nicole Soranzo<sup>2,52</sup>, Guangju Zhai<sup>52</sup>

**InChianti:** Toshiko Tanaka<sup>53</sup>

**BLSA:** Toshiko Tanaka<sup>53</sup>

**Expression data:** Zorica Jovanovic<sup>16,27</sup>, Rosa Maria Roccasecca<sup>2</sup>, Y.C. Loraine Tung<sup>16,27</sup>

**CNV Analysis:** David Altshuler<sup>11,26</sup>, Amanda L. Elliott<sup>11,26</sup>, Steven A. McCarroll<sup>11,26</sup>

### **Generating genotype data not published prior to this study**

**KORA:** Thomas Meitinger<sup>70,71</sup>

**EPIC-Norfolk:** Christopher J. Gillson<sup>15,16</sup>, Matthew A. Sims<sup>15,16</sup>

**FINRISK97:** Candace Guiducci<sup>11</sup>, Rachel Hackett<sup>11</sup>

**METSIM:** Lori L. Bonnycastle<sup>32</sup>, Matthew G. Rees<sup>32</sup>

**ALSPAC:** Susan M. Ring<sup>65</sup>

**PPP-Botnia:** Lauren Gianniny<sup>11</sup>, Noël Burt<sup>11</sup>

**FUSION (stage 2):** Michael R. Erdos<sup>32</sup>, Parimal Deodhar<sup>32</sup>

**Hertfordshire:** Christopher J. Gillson<sup>15,16</sup>, Matthew A. Sims<sup>15,16</sup>

**SardiNIA (stage 2):** Antonella Mulas<sup>30</sup>

**MRC-Ely:** Christopher J. Gillson<sup>15,16</sup>, Matthew A. Sims<sup>15,16</sup>

**Rotterdam Study:** Karol Estrada<sup>48</sup>

## **Institutional Affiliations**

1. Center for Statistical Genetics, Department of Biostatistics, University of Michigan, Ann Arbor, MI 48109, USA
2. Wellcome Trust Sanger Institute, Hinxton, Cambridge CB10 1SA, UK
3. Department of Biostatistics, School of Public Health, University of Michigan, Ann Arbor, MI 48109, USA
4. Genetics of Complex Traits, Peninsula Medical School, Exeter EX1 2LU, UK
5. Lund University Diabetes Centre, Department of Clinical Sciences, Lund University, 20502 Malmö, Sweden
6. Department of Medicine, Helsinki University, Helsinki, Finland
7. Division of Cancer Epidemiology and Genetics, National Cancer Institute, National Institutes of Health, Department of Health and Human Services, Bethesda, MD 20892, USA
8. Metabolism Initiative and Program in Medical and Population Genetics, Broad Institute of Harvard and MIT, Boston, MA 02142, USA
9. Program in Genomics and Divisions of Endocrinology and Genetics, Children's Hospital, Boston, MA 02115, USA
10. Department of Genetics, Harvard Medical School, Boston, MA 02115, USA
11. Program in Medical and Population Genetics, Broad Institute of MIT and Harvard, Cambridge, MA 02142, USA
12. Department of Nutrition, Harvard School of Public Health, Boston, MA 02115, USA
13. Channing Laboratory, Department of Medicine, Brigham and Women's Hospital, Boston, MA 02115, USA

14. Program in Molecular and Genetic Epidemiology, Harvard School of Public Health,  
Boston, MA 02115, USA
15. MRC Epidemiology Unit, Addenbrooke's Hospital, Cambridge CB2 0QQ, UK
16. Institute of Metabolic Science, Addenbrooke's Hospital, Cambridge CB2 0QQ, UK
17. Wellcome Trust Centre for Human Genetics, University of Oxford, Oxford OX3  
7BN, UK
18. Oxford Centre for Diabetes, Endocrinology and Metabolism, University of Oxford,  
Churchill Hospital, Oxford OX3 7LJ, UK
19. NIHR Oxford Biomedical Research Centre, University of Oxford, Old Road,  
Headington, Oxford OX3 7LJ, UK
20. Department of Genetics, University of North Carolina, CB 7264, Chapel Hill, NC  
27599, USA
21. Laboratory of Genetics, NIH Biomedical Research Center, National Institute on  
Aging, Baltimore, MD 21224, USA
22. Division of Community Health Sciences, St George's, University of London, London  
SW17 0RE, UK
23. Institute of Epidemiology, Helmholtz Zentrum München, Ingolstaedter Landstr. 1,  
85764 Neuherberg, Germany
24. Institute of Medical Information Processing, Biometry, and Epidemiology, Ludwig  
Maximilians University München, Marchioninstr. 15, 81377 München, Germany
25. Division of Gastroenterology, Massachusetts General Hospital, Boston, MA 02114,  
USA
26. Department of Molecular Biology, Massachusetts General Hospital, Cambridge, MA

02144, USA

27. University of Cambridge Metabolic Research Laboratories, Addenbrooke's Hospital, Cambridge CB2 0QQ, UK
28. Medical Genetics/Clinical Pharmacology and Discovery Medicine, PA 19406, USA
29. Department of Internal Medicine, BH10 Centre Hospitalier Universitaire Vaudois (CHUV), 1011 Lausanne, Switzerland
30. Istituto di Neurogenetica e Neurofarmacologia, Consiglio Nazionale delle Ricerche, Cagliari, Italy
31. Physiology and Biophysics, University of Southern California School of Medicine, Los Angeles, CA 90033, USA
32. National Human Genome Research Institute, Bethesda, MD 20892, USA
33. National Public Health Institute, Department of Epidemiology and Health Promotion, Mannerheimintie 166, FIN 00300 Helsinki, FINLAND
34. Department of Cardiovascular Sciences, University of Leicester, Clinical Sciences, Glenfield General Hospital, Leicester LE3 9QP, UK
35. Clinical Pharmacology, The William Harvey Research Institute, Bart's and The London, Queen Mary's School of Medicine and Dentistry, Charterhouse Square, London EC1M 6BQ, UK
36. Peninsula Medical School, Exeter EX5 2DW, UK
37. Department of Haematology, University of Cambridge/NHS Blood & Transplant, Cambridge CB2 2PR, UK
38. MRC Dunn Human Nutrition Unit, Wellcome Trust/MRC Building, Cambridge CB2 0XY, UK



39. MRC Centre for Nutritional Epidemiology in Cancer Prevention and Survival,  
Cambridge CB1 8RN, UK
40. Department of Public Health and Primary Care, Institute of Public Health,  
University of Cambridge, Cambridge CB2 0SR, UK
41. KTL National Public Health Institute, FI 00300 Helsinki, Finland
42. Institute of Molecular Medicine, University of Helsinki, Finland
43. Department of Medicine, University of Kuopio, 70210 Kuopio, Finland
44. MRC Centre for Causal Analyses in Translational Epidemiology, Department of  
Social Medicine, University of Bristol, Bristol BS8 2PR, UK
45. Folkhalsan Research Center, Malmiska Municipal Health Center and Hospital,  
Jakobstad, Finland
46. MRC Epidemiology Resource Centre, (University of Southampton), Southampton  
General Hospital, Southampton SO16 6YD, UK.
47. Department of Epidemiology, Erasmus MC, PO Box 2400, NL 3000 CA Rotterdam,  
The Netherlands
48. Department of Internal Medicine, Erasmus MC, PO Box 2400, NL 3000 CA  
Rotterdam, The Netherlands
49. Department of Epidemiology and Public Health, Imperial College London, St Mary's  
Campus, Norfolk Place, W2 1PG London, UK
50. Finnish Institute of Occupational Health, Aapistie 1, Fin 90220 Oulu, Finland
51. Department of Clinical Chemistry, University of Oulu, Fin 90220, Oulu, Finland
52. Department of Twin Research and Genetic Epidemiology, King's College London,  
London SE1 7EH, UK

53. National institute of Aging, Clinical research branch Longitudinal Studies Section,  
Baltimore, MD 21225, USA
54. Laboratory of Epidemiology, Demography, and Biometry; Gerontology Research  
Center, National Institute on Aging, Bethesda, MD 20892, USA
55. Department of Medical Genetics, University of Lausanne, 1005 Lausanne,  
Switzerland
56. University Institute for Social and Preventative Medicine, Centre Hospitalier  
Universitaire Vaudois (CHUV), 1005 Lausanne, Switzerland
57. Swiss Institute of Bioinformatics, Switzerland
58. Laboratory of Cardiovascular Science, Gerontology Research Center, National  
Institute on Aging, Baltimore, MD 21224, USA
59. Unita' Operativa Geriatria Istituto Nazionale Ricovero e Cura Anziani Rome, Italy
60. Department of Clinical Sciences, Lund University, 20502 Malmö, Sweden
61. Department of Preventive Medicine, Division of Biostatistics, Keck School of  
Medicine, University of Southern California, CHP 220, Los Angeles, CA 90089,  
USA
62. Bioinformed Consulting Services, Gaithersburg, MD 20877, USA
63. Yorkshire Heart Centre, Leeds General Infirmary, Leeds LS1 3EX, UK
64. Department of Child and Adolescent Psychiatry, University of Duisburg Essen,  
Virchowstr. 174, 45147 Essen, Germany
65. ALSPAC, Department of Social Medicine, University of Bristol, Bristol BS8 1TQ,  
UK

66. Department of Molecular Medicine, National Public Health Institute, FIN 00300  
Helsinki, Finland
67. Department of Oral & Dental Science, Bristol BS1 2LY, UK
68. Savitaipale Health Center, Savitaipale, Finland
69. DRL, OCDEM, Churchill Hospital, Headington, Oxford OX3 7LJ, UK
70. Institute of Human Genetics, Helmholtz Zentrum München, Ingolstaedter Landstr. 1,  
85764 Neuherberg, Germany
71. Institute of Human Genetics, Technical University Munich, D 81765, Munich,  
Germany
